# Supplementary material for: Nickel catalyzed enantioselective hydroarsination of nitrostyrene
Source: Royal Society of Chemistry journal article supplement (doi:10.1039/c7cc02044a), 2017-01-01
Supplement: c7cc02044a1.pdf [file c7cc02044a1.pdf]

## **Nickel Catalyzed Enantioselective Hydroarsination of Nitrostyrene**

Wee Shan Tay, Xiang-Yuan Yang, Yongxin Li, Sumod A. Pullarkat, Pak-Hing Leung\*

Division of Chemistry & Biological Chemistry, School of Physical and Mathematical Sciences, Nanyang Technological University, Singapore 637616, Singapore Fax: (+65) 6791 1961

e-mail: pakhing@ntu.edu.sg

### **Electronic Supporting Information**

|                                                                                 |               |
|---------------------------------------------------------------------------------|---------------|
| <b>Table of Contents</b>                                                        | <b>S1</b>     |
| <b>General Information</b>                                                      | <b>S2</b>     |
| <b>Experimental Section</b>                                                     | <b>S3-5</b>   |
| <b>NMR Spectra</b>                                                              | <b>S6-7</b>   |
| <b>References</b>                                                               | <b>S8</b>     |
| <b>HPLC Spectra</b>                                                             | <b>S9-20</b>  |
| <b>Investigation of possible interactions between complex 5c and reagent(s)</b> | <b>S21-24</b> |
| <b>Conducting of catalysis in MeOD</b>                                          | <b>S25</b>    |
| <b>Investigation of Complex 5c</b>                                              | <b>S26</b>    |
| <b>X-Ray Structure of Complex (S)-6</b>                                         | <b>S27</b>    |
| <b>Crystallographic Data for Complex (S)-6</b>                                  | <b>S27-29</b> |

## General Information

All reactions were carried out under a positive pressure of nitrogen using standard Schlenk technique. Solvents were purchased from their respective companies (ACN, MeOH, DCM: VWR Chemicals, DEE: Merck, toluene, n-hexane Avantor, Acetone: Sigma-Aldrich, THF: Tedia) and used as supplied. DCM and THF were dried and distilled. Where necessary, solvents were degassed prior to use. A Low Temp Pairstirrer PSL-1400 was used for controlling low temperature reactions. Column chromatography was done on Silica gel 60 (Merck). Melting points were measured using SRS Optimelt Automated Point System SRS MPA100. Optical rotation were measured with JASCO P-1030 Polarimeter in the specified solvent in a 0.1 dm cell at 22.0°C. NMR spectra were recorded on Bruker AV 300, AV 400 and AV 500 spectrometers. Chemical shifts were reported in ppm and referenced to an internal SiMe<sub>4</sub> standard (0 ppm) for <sup>1</sup>H NMR, chloroform-d (77.23 ppm) for <sup>13</sup>C NMR, and an external 85% H<sub>3</sub>PO<sub>4</sub> for <sup>31</sup>P{<sup>1</sup>H} NMR.

The catalysts (*S*)-**1a/b**<sup>[1]</sup> were prepared according to literature methods. Conversion of M-Cl complexes **5** to M-OAc complexes **2** were performed as described in literature.<sup>[2]</sup> All other reactants and reagents were used as a supplied.

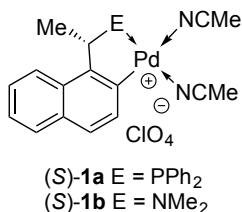

Figure s1. Catalysts involved in this work.

**Caution!** Perchlorate salts of metal complexes are potentially explosive compounds and should be handled with care.

## General Procedure for the Synthesis of Complexes (*R,R*)-5

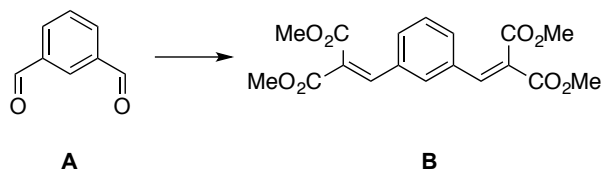

Scheme s1. Synthesis of ligand precursor.

To a solution of dimethyl malonate (5.40g, 14.91 mmol, 2.0 equiv) and piperidine (6.34g, 1.49 mmol, 0.2 equiv) in *n*-heptane (5 mL), isophthalaldehyde **A** (1.00g, 7.45 mmol, 1.0 equiv) and glacial AcOH (89.47 mg, 1.49 mmol, 0.2 equiv.) were added sequentially. The mixture was refluxed at 140°C under Dean-Stark conditions for 24 h. The mixture was cooled to RT and volatiles were removed under reduced pressure. The mixture was extracted with DCM (3 X 30 mL) and the organic layer was washed with saturated NaHCO<sub>3</sub> (1 X 30 mL) and water (3 X 30 mL), dried over MgSO<sub>4</sub>, filtered and concentrated. The crude product was purified by silica gel chromatography (2 *n*-hexanes : 1 EA) to afford compound **B** as a pale yellow solid in 80% yield. The spectroscopic data obtained is consistent with literature.<sup>[3]</sup>

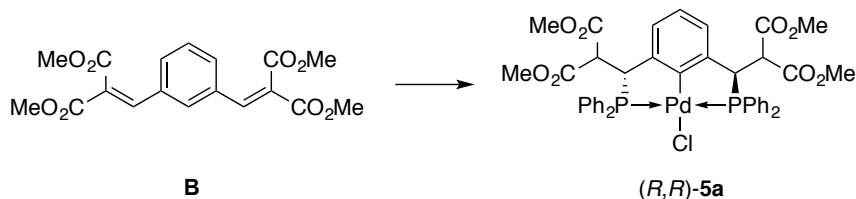

Scheme s2. Synthesis of complex (*R,R*)-5a.

Catalyst (*S*)-**1a** (38.29 mg, 0.061 mmol, 5 mol %) was added to a solution of HPPH<sub>2</sub> (0.25 g, 1.33 mmol, 2.3 equiv.) in DCM (10 mL) and stirred for 10 minutes at room temperature before cooling to -80°C. Compound **B** (0.21 g, 0.578 mmol, 1.0 equiv.) was added followed by the addition of NEt<sub>3</sub> (0.12 g, 1.16 mmol, 2.0 equiv.) in DCM (1 mL) dropwise. After stirring at -80°C for 3 days, the solution was warmed up to RT. PdCl<sub>2</sub>(CH<sub>3</sub>CN)<sub>2</sub> (0.15 g, 0.578 mmol, 1.0 equiv.) was added and the solution was stirred overnight at RT. Volatiles were removed and the crude product was purified *via* silica gel chromatography (DCM) to afford complex (*R,R*)-**5a** as a white solid in 86% yield. The spectroscopic data obtained is consistent with literature.<sup>[3]</sup>

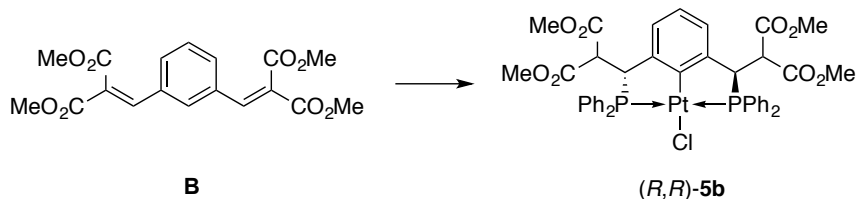

Scheme s3. Synthesis of complex (*R,R*)-5b.

Catalyst (*S*)-**1a** (38.29 mg, 0.061 mmol, 5 mol %) was added to a solution of HPPH<sub>2</sub> (0.25 g, 1.33 mmol, 2.3 equiv.) in DCM (10 mL) and stirred for 10 minutes at room temperature before cooling to 80°C. Compound **B** (0.21 g, 0.578 mmol, 1.0 equiv.) was added followed by the addition of NEt<sub>3</sub> (0.12 g, 1.16 mmol, 2.0 equiv.) in DCM (1 mL) dropwise. After stirring at -80°C for 3 days, the solution was warmed up to RT. Volatiles were removed and the residue was redissolved in toluene. PtCl<sub>2</sub>(CH<sub>3</sub>CN)<sub>2</sub> (0.20 g, 0.578 mmol, 1.0 equiv.) was added and the solution was heated at 100°C for 4h. Upon cooling to RT, volatiles were removed and the crude product was purified *via* silica gel chromatography (19 DCM : 1 EA)

to afford complex (*R,R*)-**5b** as a white solid. The spectroscopic data obtained is consistent with literature.<sup>[3]</sup>

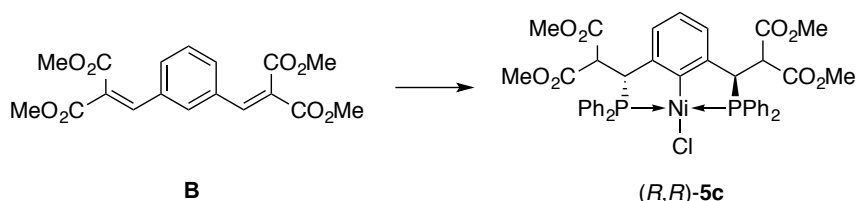

**Scheme s4. Synthesis of complex (*R,R*)-5c.**

Catalyst (*S*)-**1a** (38.29 mg, 0.061 mmol, 5 mol %) was added to a solution of HPPH<sub>2</sub> (0.25 g, 1.22 mmol, 2.1 equiv.) in DCM (10 mL) and stirred for 10 minutes at room temperature before cooling to -80°C. Compound **B** (0.21 g, 0.578 mmol, 1.0 equiv.) was added followed by the addition of NEt<sub>3</sub> (0.12 g, 1.16 mmol, 2.0 equiv.) in DCM (1 mL) dropwise. After stirring at -80°C for 3 days, the solution was warmed up to RT. Volatiles were removed and the residue was redissolved in EtOH. NiCl<sub>2</sub>(CH<sub>3</sub>CN)<sub>2</sub> (0.12 g, 0.578 mmol, 1.0 equiv.) in H<sub>2</sub>O (1 mL) was added and the mixture heated at 60°C for 4 h. Subsequently, NEt<sub>2</sub><sup>*i*</sup>Pr (74.70 mg, 0.578 mmol, 1.0 equiv.) was added and the mixture was refluxed at 80°C for 1 h. Upon cooling to RT, volatiles were removed and the crude product was purified *via* silica gel chromatography (19 DCM : 1 EA) to afford complex (*R,R*)-**5c** as a yellow solid in 68% yield. The spectroscopic data obtained is consistent with literature.<sup>[3]</sup>

### General Procedure for Catalytic Hydroarsination Reaction

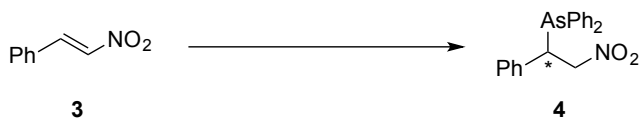

**Scheme s5. Catalytic asymmetric hydroarsination reaction.**

A stock solution of the catalyst in MeOH (1.00 mM, 5 mL, 5 mol %) was added to a solution of diphenylarsine (2.76 mg, 12.00 μmol, 1.2 equiv.) in the stated solvent (1 mL) and brought to the desired temperature. Nitrostyrene **3** (1.49 mg, 10.0 μmol, 1.0 equiv.) was subsequently added and washed down with the stated solvent to make 2 mL. The reaction was stirred at the indicated temperature and checked every 15 mins by TLC to monitor the consumption of nitrostyrene. Upon completion of the reaction, two drops of the crude reaction mixture was withdrawn from the flask and diluted with hexane (1 mL) to prepare the HPLC sample. The arsine adduct could be crystallized from a mixture of DCM/MeOH to afford the pure product **4** as white crystalline needles. The *ee* was determined on a Daicel Chiralpak ID column with *n*-hexane/2-propanol = 99/1, flow = 0.8 mL/min, wavelength = 254 nm. Retention times: 8.7 min (minor, *R* isomer), 9.5 min (major, *S* isomer). [α]<sub>D</sub> = -45.2 (*c* 2.75, MeOH) (measured for Table 3 Entry 9). Mp: 88-90°C. <sup>1</sup>H NMR (CD<sub>3</sub>CN, 400 MHz): δ 7.68-7.65 (m, 2H, Ar), 7.48-7.47 (m, 2H, Ar), 7.29-7.27 (m, 3H, Ar), 7.25-7.21 (m, 6H, Ar), 7.19-7.16 (m, 1H, Ar), 4.99 (dd, 1H, <sup>3</sup>J<sub>HH</sub> = 13.0 Hz, <sup>3</sup>J<sub>HH</sub> = 12.8 Hz, AsCH), 4.60 (dd, 1H, <sup>3</sup>J<sub>HH</sub> = 13.0 Hz, <sup>2</sup>J<sub>HH</sub> = 4.0 Hz, NCH), (dd, 1H, <sup>3</sup>J<sub>HH</sub> = 12.6 Hz, <sup>2</sup>J<sub>HH</sub> = 4.0 Hz, NCH); <sup>13</sup>C NMR (CD<sub>3</sub>CN, 100 MHz): δ 134.5-128.1 (15C, Ar), 79.7 (s, 1C, AsC), 43.8 (s, 1C, NC). HRMS (+ESI) *m/z*: (M + H)<sup>+</sup> calcd for C<sub>20</sub>H<sub>19</sub>NO<sub>2</sub>As, 380.0632; found, 380.0625. Anal. Calcd for C<sub>20</sub>H<sub>18</sub>NO<sub>2</sub>As: C, 63.33; H, 4.78; N, 3.69. Found: C, 63.34; H, 5.09; N, 3.95 %.

**Additional Notes:** The arsine adduct **4** can be selectively precipitated from the crude reaction mixture by removing the reaction solvent, redissolving the residue in a minimal

amount of DCM and topping up with MeOH (2 mL). Upon stirring under reduced pressure, a white solid precipitates from the DCM/MeOH mixture.

#### General Procedure for Synthesis of Complex (S)-6

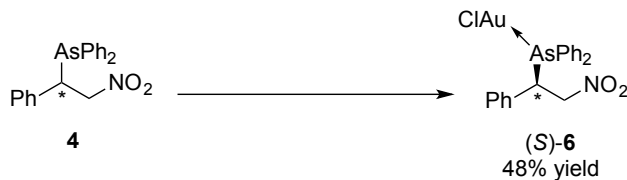

Scheme s6. Synthesis of complex (S)-6.

To a solution of adduct **4** (10.10 mg, 29.00  $\mu\text{mol}$ , 1.0equiv.) in DCM (3 mL) was added AuCl(SMe<sub>2</sub>) (10.25 mg, 34.80  $\mu\text{mol}$ , 1.2 equiv.). The mixture was stirred in the dark overnight at RT and subsequently washed with H<sub>2</sub>O (3 X 10 mL) and dried over MgSO<sub>4</sub>. The crude complex **6** could be recrystallized from ACN to afford pure complex (S)-**6** as colourless crystals in 48% yield.  $[\alpha]_D = -84.4$  (*c* 1.58, ACN). Mp: 130-131°C (*dec.*). <sup>1</sup>H NMR (CD<sub>3</sub>CN, 400 MHz):  $\delta$  7.94-7.91 (m, 2H, Ar), 7.66-7.46 (m, 3H, Ar), 7.40-7.37 (m, 3H, Ar), 7.35-7.35 (m, 2H, Ar), 7.34-7.33 (m, 2H, Ar), 7.27-7.24 (m, 3H, Ar), 5.27 (dd, 1H, <sup>3</sup>J<sub>HH</sub> = 13.88 Hz, <sup>3</sup>J<sub>HH</sub> = 11.96 Hz, AsCH), 5.00 (dd, 1H, <sup>3</sup>J<sub>HH</sub> = 11.90 Hz, <sup>2</sup>J<sub>HH</sub> = 4.18 Hz, NCH), 4.85 (dd, 1H <sup>3</sup>J<sub>HH</sub> = 13.92 Hz, <sup>2</sup>J<sub>HH</sub> = 4.2 Hz, NCH); <sup>13</sup>C NMR (CD<sub>3</sub>CN, 100 MHz):  $\delta$  134.5-128.1 (15C, Ar), 76.9 (s, 1C, AsC), 43.8 (s, 1C, NC). HRMS (+ESI) m/z: (M + H)<sup>+</sup> calcd for C<sub>20</sub>H<sub>19</sub>NO<sub>2</sub>AsAuCl, 613.9956; found, 613.9951. Anal. Calcd for C<sub>20</sub>H<sub>18</sub>NO<sub>2</sub>AsAuCl: C, 39.27; H, 2.97; N, 2.29. Found: C, 39.73; H, 3.36; N, 2.27 %.

## NMR Spectra

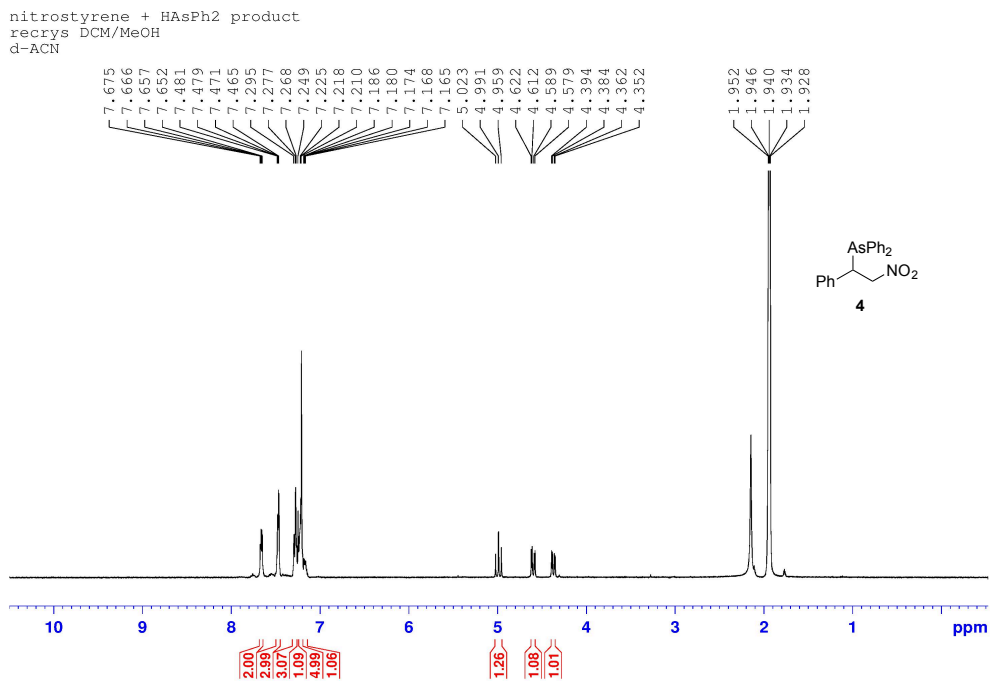

Figure s2. <sup>1</sup>H NMR spectrum of adduct 4 in CD<sub>3</sub>CN, 400MHz.

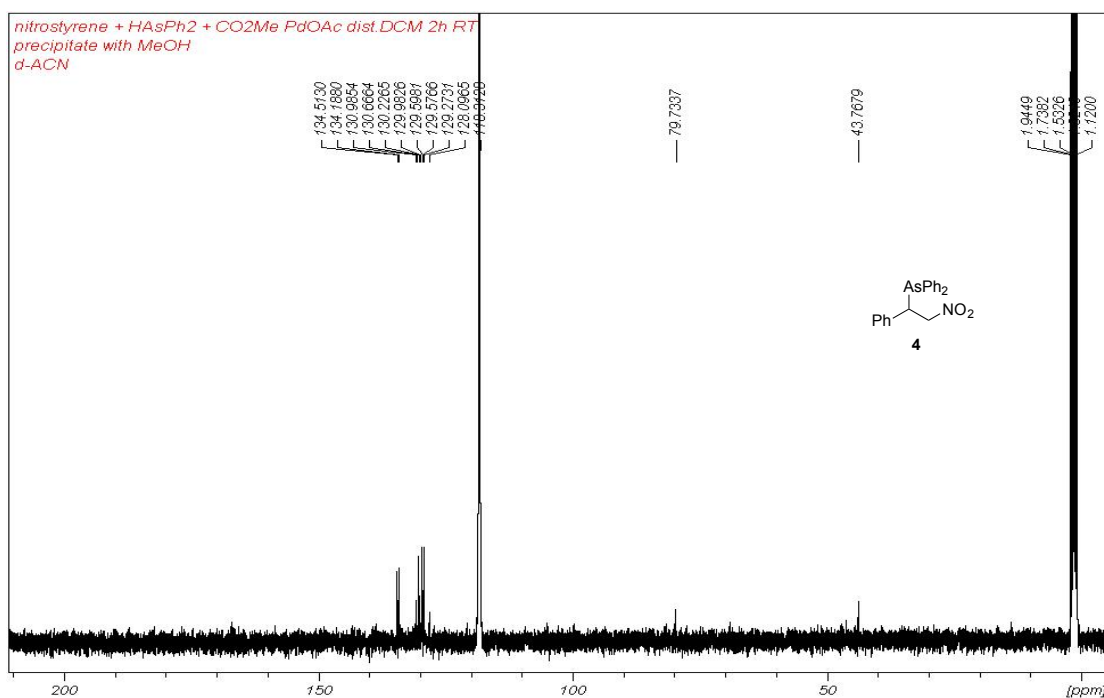

Figure s3. <sup>13</sup>C NMR spectrum of adduct 4 in CD<sub>3</sub>CN, 100MHz.

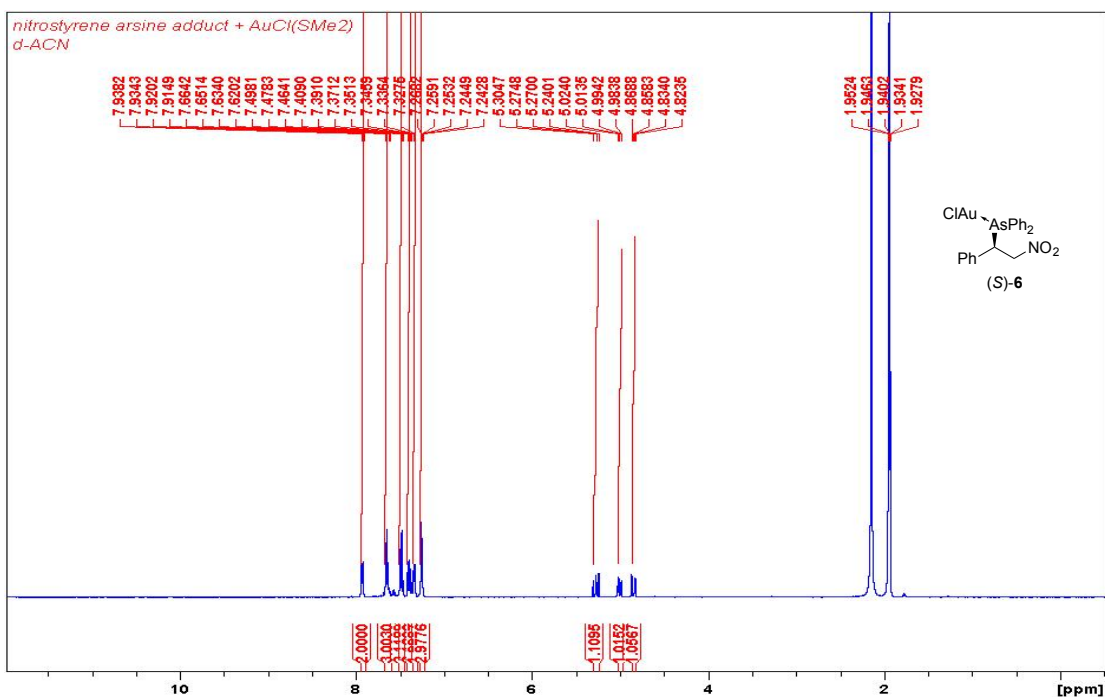

Figure s4. <sup>1</sup>H NMR spectrum of complex (S)-6 in CD<sub>3</sub>CN, 400MHz.

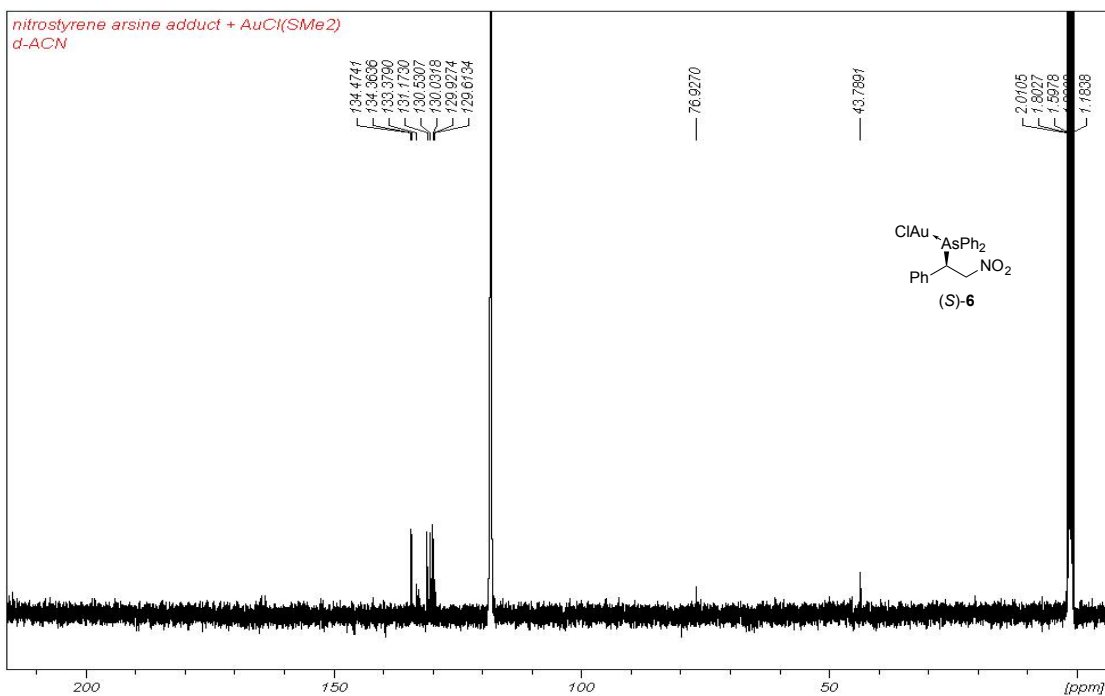

Figure s5. <sup>13</sup>C NMR spectrum of complex (S)-6 in CD<sub>3</sub>CN, 100MHz.

## **References**

- [1] a) Y. Huang, R. J. Chew, Y.; Li, S. A. Pullarkat and P.-H. Leung, *Org. Lett.*, 2011, **13**, 5862; b) Y. Huang, S. A. Pullarkat, Y. Li and P.-H. Leung, *Chem. Commun*, 2010, **46**, 6950.
- [2] X.-Y. Yang, W. S. Tay, Y. Li, S. A. Pullarkat and P.-H. Leung, *Organometallics*, 2015, **34**, 5196.
- [3] X.-Y. Yang, W. S. Tay, Y. Li, S. A. Pullarkat and P.-H. Leung, *Organometallics*, 2015, **34**, 1582.



# HPLC Spectra

## Racemic adduct 4

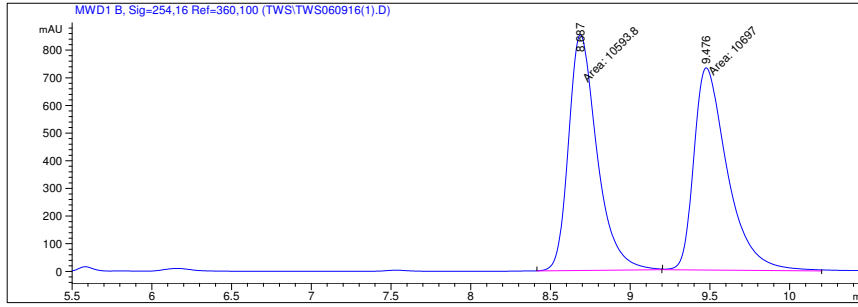

=====  
Area Percent Report  
=====

Sorted By : Signal  
Multiplier: : 1.0000  
Dilution: : 1.0000  
Sample Amount: : 1.00000 [ng/ul] (not used in calc.)  
Do not use Multiplier & Dilution Factor with ISTDs

Signal 1: MWD1 B, Sig=254,16 Ref=360,100

| Peak # | RetTime [min] | Type | Width [min] | Area [mAU*s] | Height [mAU] | Area %  |
|--------|---------------|------|-------------|--------------|--------------|---------|
| 1      | 8.687         | MM   | 0.2068      | 1.05938e4    | 853.82373    | 49.7577 |
| 2      | 9.476         | MM   | 0.2437      | 1.06970e4    | 731.61487    | 50.2423 |

Totals : 2.12908e4 1585.43860

Figure s6. HPLC spectrum of racemic adduct 4.

## Table 1 Entry 3

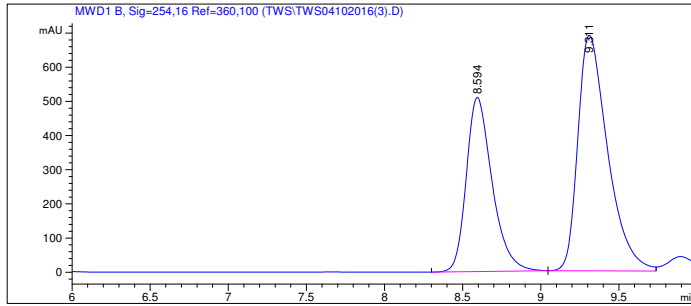

=====  
Area Percent Report  
=====

Sorted By : Signal  
Multiplier: : 1.0000  
Dilution: : 1.0000  
Sample Amount: : 1.00000 [ng/ul] (not used in calc.)  
Do not use Multiplier & Dilution Factor with ISTDs

Signal 1: MWD1 B, Sig=254,16 Ref=360,100

| Peak # | RetTime [min] | Type | Width [min] | Area [mAU*s] | Height [mAU] | Area %  |
|--------|---------------|------|-------------|--------------|--------------|---------|
| 1      | 8.594         | BB   | 0.1760      | 5853.19580   | 509.77792    | 39.0131 |
| 2      | 9.311         | BV   | 0.2008      | 9149.96484   | 689.64508    | 60.9869 |

Totals : 1.50032e4 1199.42300

Figure s7. HPLC spectrum of chiral adduct 4 in Table 1 Entry 3.

Table 2 Entry 1

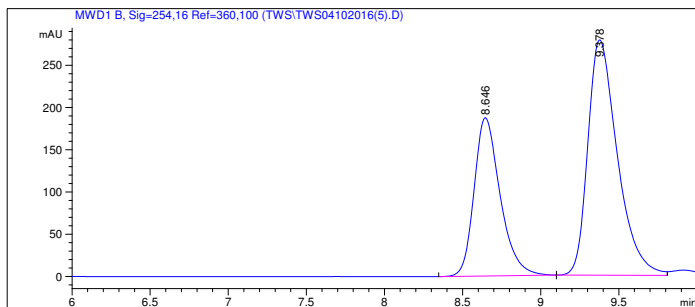

=====  
 Area Percent Report  
 =====

Sorted By : Signal  
 Multiplier: : 1.0000  
 Dilution: : 1.0000  
 Sample Amount: : 1.00000 [ng/ul] (not used in calc.)  
 Do not use Multiplier & Dilution Factor with ISTDs

Signal 1: MWD1 B, Sig=254,16 Ref=360,100

| Peak # | RetTime [min] | Type | Width [min] | Area [mAU*s] | Height [mAU] | Area %  |
|--------|---------------|------|-------------|--------------|--------------|---------|
| 1      | 8.646         | BB   | 0.1751      | 2169.89209   | 187.37817    | 37.2030 |
| 2      | 9.378         | BV   | 0.1993      | 3662.68677   | 278.71609    | 62.7970 |

Totals : 5832.57886 466.09427

Figure s8. HPLC spectrum of chiral adduct 4 in Table 2 Entry 1.

Table 2 Entry 2

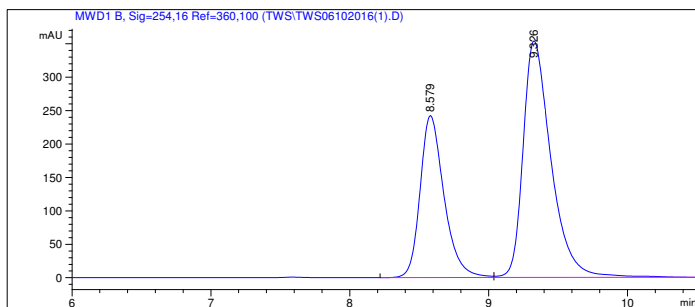

=====  
 Area Percent Report  
 =====

Sorted By : Signal  
 Multiplier: : 1.0000  
 Dilution: : 1.0000  
 Sample Amount: : 1.00000 [ng/ul] (not used in calc.)  
 Do not use Multiplier & Dilution Factor with ISTDs

Signal 1: MWD1 B, Sig=254,16 Ref=360,100

| Peak # | RetTime [min] | Type | Width [min] | Area [mAU*s] | Height [mAU] | Area %  |
|--------|---------------|------|-------------|--------------|--------------|---------|
| 1      | 8.579         | BV   | 0.1817      | 2903.06812   | 242.37688    | 36.8709 |
| 2      | 9.326         | VB   | 0.2118      | 4970.54199   | 353.94751    | 63.1291 |

Totals : 7873.61011 596.32439

Figure s9. HPLC spectrum of chiral adduct 4 in Table 2 Entry 2.

Table 2 Entry 3

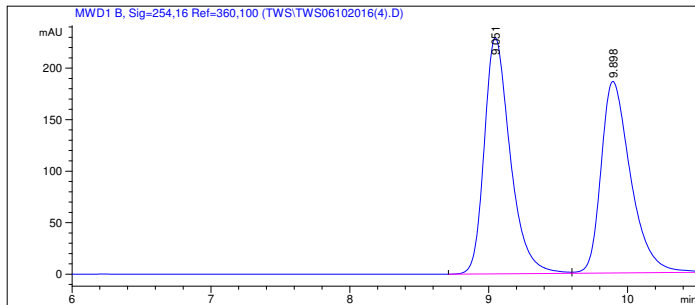

```

=====
                          Area Percent Report
=====

Sorted By      :      Signal
Multiplier:    :      1.0000
Dilution:      :      1.0000
Sample Amount: :      1.00000 [ng/ul] (not used in calc.)
Do not use Multiplier & Dilution Factor with ISTDs

Signal 1: MWD1 B, Sig=254,16 Ref=360,100

Peak RetTime Type Width Area Height Area
# [min] ----- [min] [mAU*s] [mAU] %
-----|-----|-----|-----|-----|
1  9.051 BV  0.1974 2977.60376 229.50180 51.9359
2  9.898 VB  0.2247 2755.62207 186.15942 48.0641

Totals :                5733.22583 415.66122
    
```

Figure s10. HPLC spectrum of chiral adduct 4 in Table 2 Entry 3.

Table 2 Entry 4

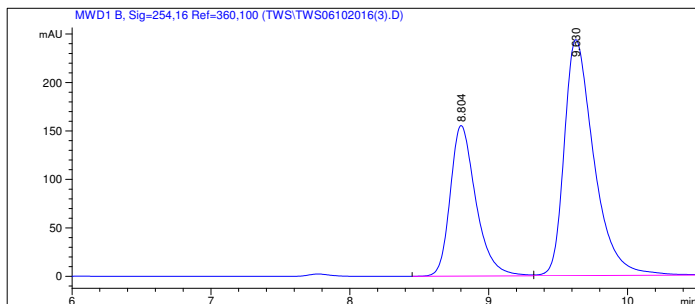

```

=====
                          Area Percent Report
=====

Sorted By      :      Signal
Multiplier:    :      1.0000
Dilution:      :      1.0000
Sample Amount: :      1.00000 [ng/ul] (not used in calc.)
Do not use Multiplier & Dilution Factor with ISTDs

Signal 1: MWD1 B, Sig=254,16 Ref=360,100

Peak RetTime Type Width Area Height Area
# [min] ----- [min] [mAU*s] [mAU] %
-----|-----|-----|-----|-----|
1  8.804 BV  0.1935 1990.90710 155.41502 35.4565
2  9.630 VBA 0.2256 3624.16748 243.54282 64.5435

Totals :                5615.07458 398.95784
    
```

Figure s11. HPLC spectrum of chiral adduct 4 in Table 2 Entry 4.

Table 2 Entry 5

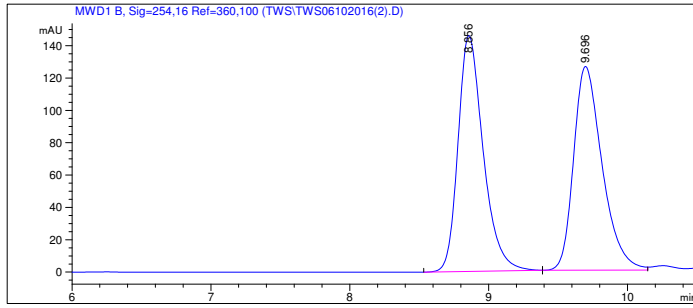

```

=====
                          Area Percent Report
=====

Sorted By      :      Signal
Multiplier:    :      1.0000
Dilution:      :      1.0000
Sample Amount: :      1.00000 [ng/ul] (not used in calc.)
Do not use Multiplier & Dilution Factor with ISTDs

Signal 1: MWD1 B, Sig=254,16 Ref=360,100

Peak RetTime Type Width Area Height Area
# [min] |----| [min] [mAU*s] [mAU] %
-----|----|-----|-----|-----|-----
  1  8.856 BB  0.1907 1835.72241 146.02344 50.4926
  2  9.696 BV  0.2166 1799.90637 126.03658 49.5074

Totals :                3635.62878 272.06001
    
```

Figure s12. HPLC spectrum of chiral adduct 4 in Table 2 Entry 5.

Table 2 Entry 6

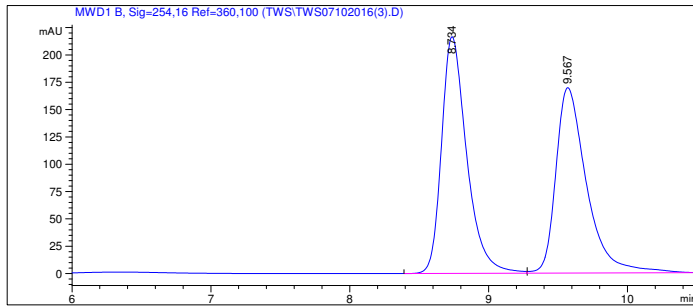

```

=====
                          Area Percent Report
=====

Sorted By      :      Signal
Multiplier:    :      1.0000
Dilution:      :      1.0000
Sample Amount: :      1.00000 [ng/ul] (not used in calc.)
Do not use Multiplier & Dilution Factor with ISTDs

Signal 1: MWD1 B, Sig=254,16 Ref=360,100

Peak RetTime Type Width Area Height Area
# [min] |----| [min] [mAU*s] [mAU] %
-----|----|-----|-----|-----|-----
  1  8.734 BV  0.1912 2732.97363 216.62737 51.1868
  2  9.567 VBA 0.2313 2606.24512 169.61288 48.8132

Totals :                5339.21875 386.24025
    
```

Figure s13. HPLC spectrum of chiral adduct 4 in Table 2 Entry 6.

Table 2 Entry 7

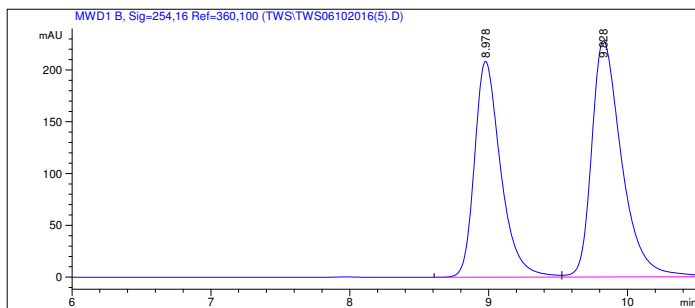

=====  
Area Percent Report  
=====

Sorted By : Signal  
Multiplier: : 1.0000  
Dilution: : 1.0000  
Sample Amount: : 1.00000 [ng/ul] (not used in calc.)  
Do not use Multiplier & Dilution Factor with ISTDs

Signal 1: MWD1 B, Sig=254,16 Ref=360,100

| Peak # | RetTime [min] | Type | Width [min] | Area [mAU*s] | Height [mAU] | Area %  |
|--------|---------------|------|-------------|--------------|--------------|---------|
| 1      | 8.978         | BV   | 0.1990      | 2734.94482   | 208.51024    | 44.2359 |
| 2      | 9.828         | VB   | 0.2282      | 3447.68896   | 228.31659    | 55.7641 |

Totals : 6182.63379 436.82683

Figure s14. HPLC spectrum of chiral adduct 4 in Table 2 Entry 7.

Table 2 Entry 8

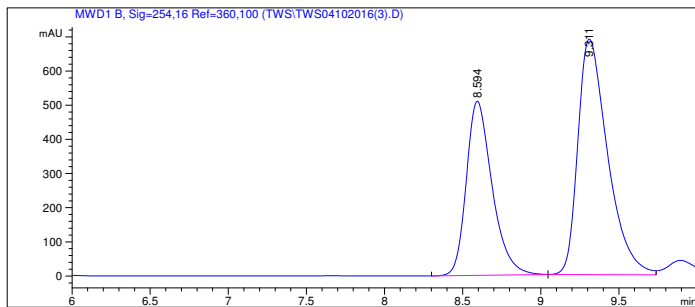

=====  
Area Percent Report  
=====

Sorted By : Signal  
Multiplier: : 1.0000  
Dilution: : 1.0000  
Sample Amount: : 1.00000 [ng/ul] (not used in calc.)  
Do not use Multiplier & Dilution Factor with ISTDs

Signal 1: MWD1 B, Sig=254,16 Ref=360,100

| Peak # | RetTime [min] | Type | Width [min] | Area [mAU*s] | Height [mAU] | Area %  |
|--------|---------------|------|-------------|--------------|--------------|---------|
| 1      | 8.594         | BB   | 0.1760      | 5853.19580   | 509.77792    | 39.0131 |
| 2      | 9.311         | BV   | 0.2008      | 9149.96484   | 689.64508    | 60.9869 |

Totals : 1.50032e4 1199.42300

Figure s15. HPLC spectrum of chiral adduct 4 in Table 2 Entry 8.

Table 2 Entry 9

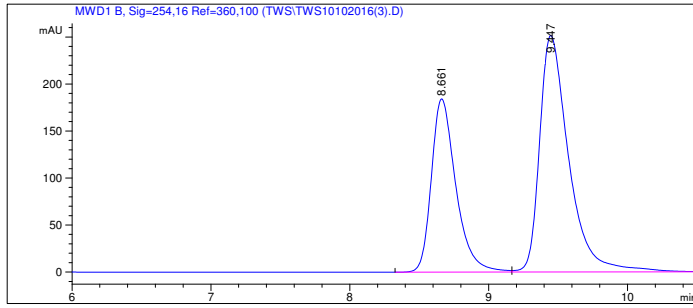

```

=====
                          Area Percent Report
=====
Sorted By      :      Signal
Multiplier:    :      1.0000
Dilution:      :      1.0000
Sample Amount: :      1.00000 [ng/ul] (not used in calc.)
Do not use Multiplier & Dilution Factor with ISTDs

Signal 1: MWD1 B, Sig=254,16 Ref=360,100

Peak RetTime Type Width Area Height Area
# [min] ----- [min] [mAU*s] [mAU] %
-----|-----|-----|-----|-----|-----
  1  8.661 BV    0.1850 2260.53589 184.42827 38.0587
  2  9.447 VBA  0.2186 3679.06055 251.60297 61.9413

Totals :                      5939.59644 436.03123
    
```

Figure s16. HPLC spectrum of chiral adduct 4 in Table 2 Entry 9.

Table 2 Entry 10

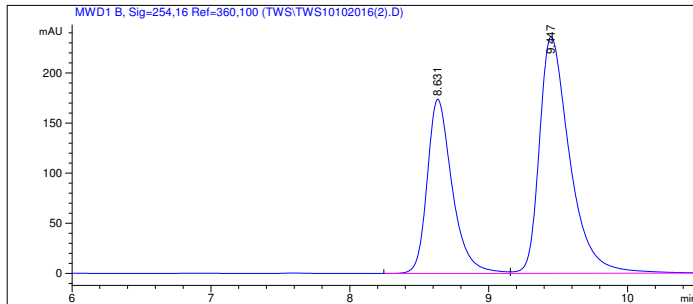

```

=====
                          Area Percent Report
=====
Sorted By      :      Signal
Multiplier:    :      1.0000
Dilution:      :      1.0000
Sample Amount: :      1.00000 [ng/ul] (not used in calc.)
Do not use Multiplier & Dilution Factor with ISTDs

Signal 1: MWD1 B, Sig=254,16 Ref=360,100

Peak RetTime Type Width Area Height Area
# [min] ----- [min] [mAU*s] [mAU] %
-----|-----|-----|-----|-----|-----
  1  8.631 BV    0.1878 2172.72510 173.88896 37.7082
  2  9.447 VB  0.2292 3589.21753 236.32446 62.2918

Totals :                      5761.94263 410.21342
    
```

Figure s17. HPLC spectrum of chiral adduct 4 in Table 2 Entry 10.

Table 2 Entry 11

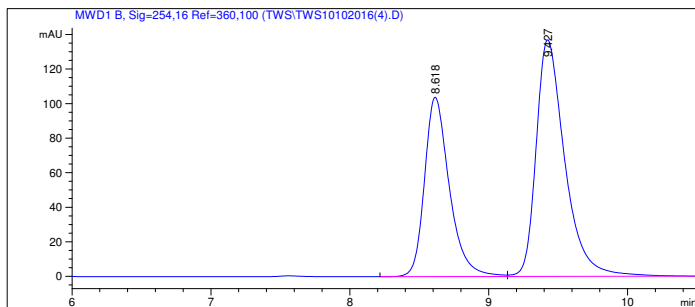

=====  
 Area Percent Report  
 =====

Sorted By : Signal  
 Multiplier: : 1.0000  
 Dilution: : 1.0000  
 Sample Amount: : 1.00000 [ng/ul] (not used in calc.)  
 Do not use Multiplier & Dilution Factor with ISTDs

Signal 1: MWD1 B, Sig=254,16 Ref=360,100

| Peak # | RetTime [min] | Type | Width [min] | Area [mAU*s] | Height [mAU] | Area %  |
|--------|---------------|------|-------------|--------------|--------------|---------|
| 1      | 8.618         | BV   | 0.1872      | 1292.54565   | 103.88760    | 39.6951 |
| 2      | 9.427         | VBA  | 0.2173      | 1963.64270   | 136.95599    | 60.3049 |

Totals : 3256.18835 240.84359

Figure s18. HPLC spectrum of chiral adduct 4 in Table 2 Entry 11.

Table 3 Entry 1

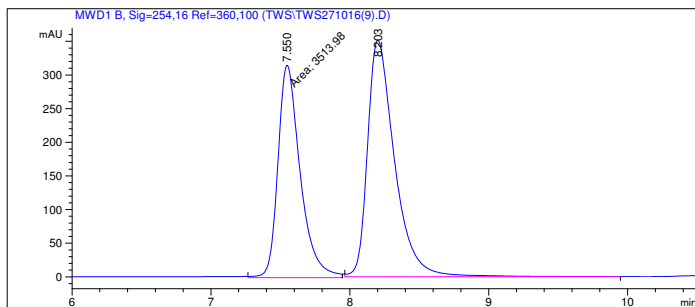

=====  
 Area Percent Report  
 =====

Sorted By : Signal  
 Multiplier: : 1.0000  
 Dilution: : 1.0000  
 Sample Amount: : 1.00000 [ng/ul] (not used in calc.)  
 Do not use Multiplier & Dilution Factor with ISTDs

Signal 1: MWD1 B, Sig=254,16 Ref=360,100

| Peak # | RetTime [min] | Type | Width [min] | Area [mAU*s] | Height [mAU] | Area %  |
|--------|---------------|------|-------------|--------------|--------------|---------|
| 1      | 7.550         | MM   | 0.1853      | 3513.97583   | 316.01166    | 42.4614 |
| 2      | 8.203         | VB   | 0.2039      | 4761.72852   | 351.82452    | 57.5386 |

Totals : 8275.70435 667.83618

Figure s19. HPLC spectrum of chiral adduct 4 in Table 3 Entry 1.

Table 3 Entry 2

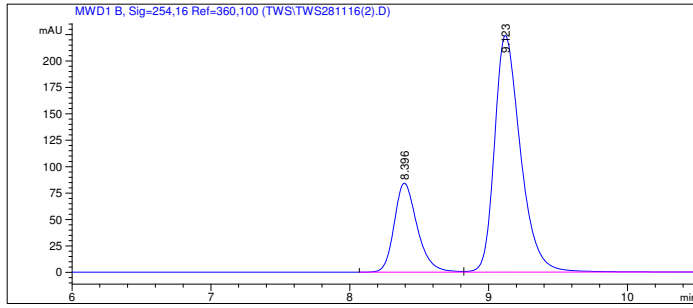

=====  
Area Percent Report  
=====

Sorted By : Signal  
Multiplier: : 1.0000  
Dilution: : 1.0000  
Sample Amount: : 1.00000 [ng/ul] (not used in calc.)  
Do not use Multiplier & Dilution Factor with ISTDs

Signal 1: MWD1 B, Sig=254,16 Ref=360,100

| Peak # | RetTime [min] | Type | Width [min] | Area [mAU*s] | Height [mAU] | Area %  |
|--------|---------------|------|-------------|--------------|--------------|---------|
| 1      | 8.396         | BV   | 0.1763      | 970.70715    | 84.32536     | 24.9808 |
| 2      | 9.123         | VB   | 0.1979      | 2915.10889   | 223.93932    | 75.0192 |

Totals : 3885.81604 308.26468

Figure s20. HPLC spectrum of chiral adduct 4 in Table 3 Entry 2.

Table 3 Entry 3

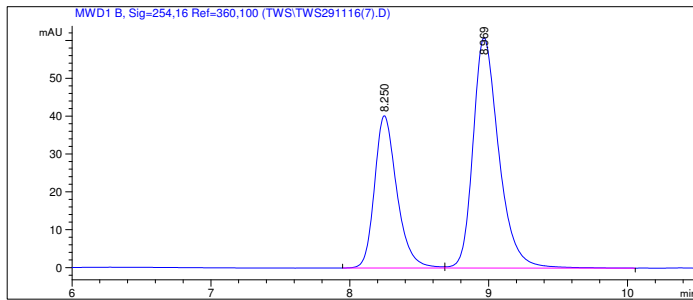

=====  
Area Percent Report  
=====

Sorted By : Signal  
Multiplier: : 1.0000  
Dilution: : 1.0000  
Sample Amount: : 1.00000 [ng/ul] (not used in calc.)  
Do not use Multiplier & Dilution Factor with ISTDs

Signal 1: MWD1 B, Sig=254,16 Ref=360,100

| Peak # | RetTime [min] | Type | Width [min] | Area [mAU*s] | Height [mAU] | Area %  |
|--------|---------------|------|-------------|--------------|--------------|---------|
| 1      | 8.250         | BV   | 0.1705      | 450.32977    | 40.26073     | 36.4450 |
| 2      | 8.969         | VB   | 0.1965      | 785.31091    | 60.88341     | 63.5550 |

Totals : 1235.64069 101.14415

Figure s21. HPLC spectrum of chiral adduct 4 in Table 3 Entry 3.



Table 3 Entry 4

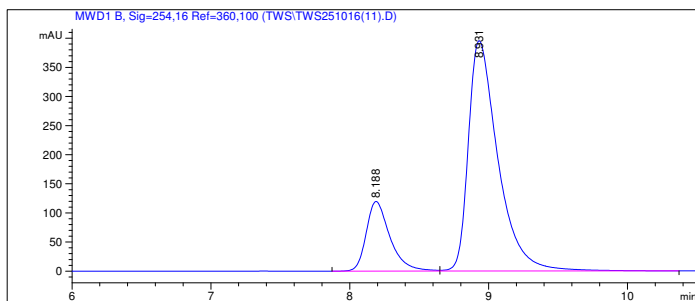

```

=====
                          Area Percent Report
=====

Sorted By      :      Signal
Multiplier:    :      1.0000
Dilution:      :      1.0000
Sample Amount: :      1.00000 [ng/ul] (not used in calc.)
Do not use Multiplier & Dilution Factor with ISTDs

Signal 1: MWD1 B, Sig=254,16 Ref=360,100

Peak RetTime Type Width Area Height Area
# [min] ----- [min] [mAU*s] [mAU] %
-----|-----|-----|-----|-----|-----
  1  8.188 BV    0.1788 1425.04724 119.77242 19.5273
  2  8.931 VB    0.2231 5872.66162 395.74384 80.4727

Totals :                7297.70886 515.51626
    
```

Figure s22. HPLC spectrum of chiral adduct 4 in Table 3 Entry 4.

Table 3 Entry 5

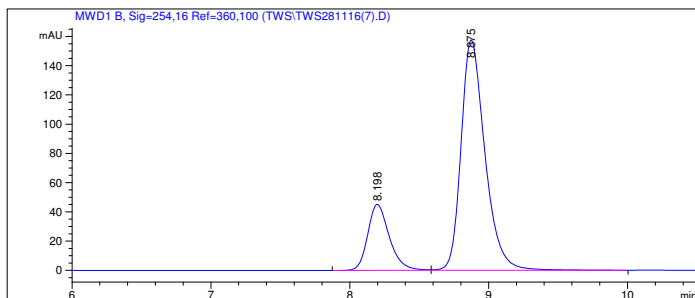

```

=====
                          Area Percent Report
=====

Sorted By      :      Signal
Multiplier:    :      1.0000
Dilution:      :      1.0000
Sample Amount: :      1.00000 [ng/ul] (not used in calc.)
Do not use Multiplier & Dilution Factor with ISTDs

Signal 1: MWD1 B, Sig=254,16 Ref=360,100

Peak RetTime Type Width Area Height Area
# [min] ----- [min] [mAU*s] [mAU] %
-----|-----|-----|-----|-----|-----
  1  8.198 BV    0.1640 488.04959 45.18439 20.5814
  2  8.875 VB    0.1814 1883.26697 157.62961 79.4186

Totals :                2371.31656 202.81400
    
```

Figure s23. HPLC spectrum of chiral adduct 4 in Table 3 Entry 5.

Table 3 Entry 6

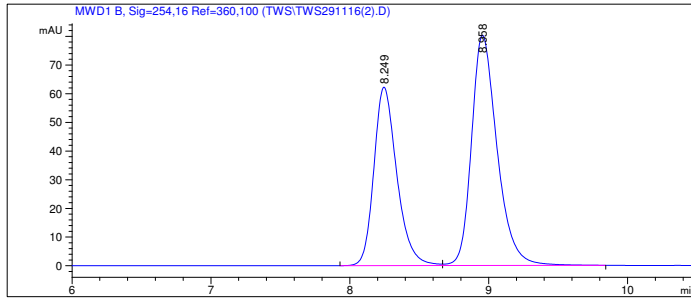

```

=====
                          Area Percent Report
=====

Sorted By      :      Signal
Multiplier:    :      1.0000
Dilution:      :      1.0000
Sample Amount: :      1.00000 [ng/ul] (not used in calc.)
Do not use Multiplier & Dilution Factor with ISTDs

Signal 1: MWD1 B, Sig=254,16 Ref=360,100

Peak RetTime Type Width Area Height Area
# [min] [min] [mAU*s] [mAU] %
-----|-----|-----|-----|-----|-----
1 8.249 BV 0.1741 715.68628 62.24938 41.0504
2 8.958 VB 0.1932 1027.74866 80.34298 58.9496

Totals : 1743.43494 142.59236
    
```

Figure s24. HPLC spectrum of chiral adduct 4 in Table 3 Entry 6.

Table 3 Entry 7

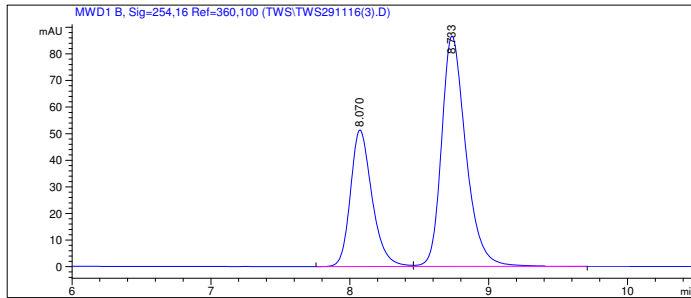

```

=====
                          Area Percent Report
=====

Sorted By      :      Signal
Multiplier:    :      1.0000
Dilution:      :      1.0000
Sample Amount: :      1.00000 [ng/ul] (not used in calc.)
Do not use Multiplier & Dilution Factor with ISTDs

Signal 1: MWD1 B, Sig=254,16 Ref=360,100

Peak RetTime Type Width Area Height Area
# [min] [min] [mAU*s] [mAU] %
-----|-----|-----|-----|-----|-----
1 8.070 BV 0.1639 554.80365 51.39540 34.5046
2 8.733 VB 0.1858 1053.10840 86.66793 65.4954

Totals : 1607.91205 138.06333
    
```

Figure s25. HPLC spectrum of chiral adduct 4 in Table 3 Entry 7.

Table 3 Entry 8

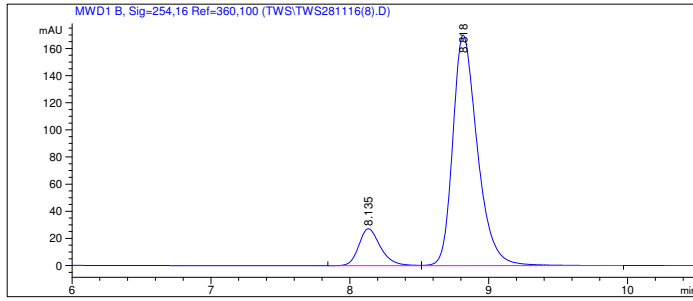

```

=====
                          Area Percent Report
=====

Sorted By      :      Signal
Multiplier:    :      1.0000
Dilution:      :      1.0000
Sample Amount: :      1.00000 [ng/ul] (not used in calc.)
Do not use Multiplier & Dilution Factor with ISTDs

Signal 1: MWD1 B, Sig=254,16 Ref=360,100

Peak RetTime Type Width Area Height Area
# [min] [min] [mAU*s] [mAU] %
-----|-----|-----|-----|-----|-----
1 8.135 BV 0.1648 296.04175 27.22886 12.3763
2 8.818 VB 0.1878 2095.97266 170.00188 87.6237

Totals :                2392.01440 197.23074
    
```

Figure s26. HPLC spectrum of chiral adduct 4 in Table 3 Entry 8.

Table 3 Entry 9

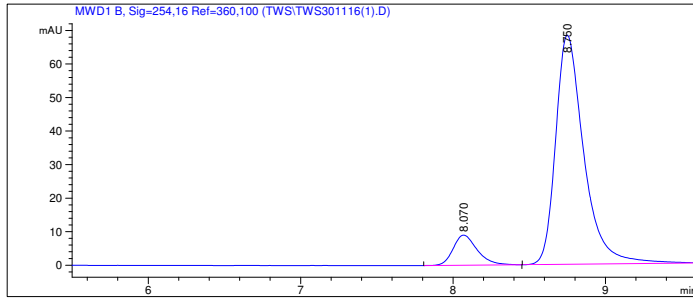

```

=====
                          Area Percent Report
=====

Sorted By      :      Signal
Multiplier:    :      1.0000
Dilution:      :      1.0000
Sample Amount: :      1.00000 [ng/ul] (not used in calc.)
Do not use Multiplier & Dilution Factor with ISTDs

Signal 1: MWD1 B, Sig=254,16 Ref=360,100

Peak RetTime Type Width Area Height Area
# [min] [min] [mAU*s] [mAU] %
-----|-----|-----|-----|-----|-----
1 8.070 BB 0.1659 98.58515 8.99597 10.0781
2 8.750 BBA 0.1940 879.62396 68.40292 89.9219

Totals :                978.20911 77.39889
    
```

Figure s27. HPLC spectrum of chiral adduct 4 in Table 3 Entry 9.

Table 3 Entry 10

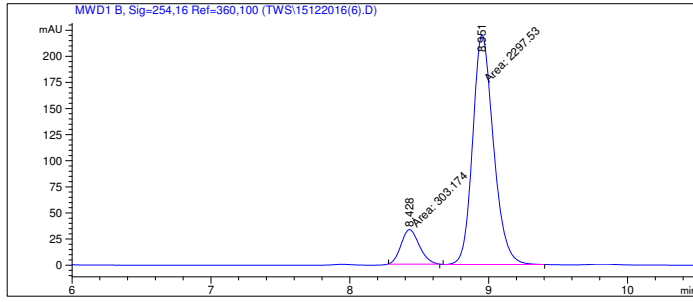

```

=====
                          Area Percent Report
=====

Sorted By      :      Signal
Multiplier:    :      1.0000
Dilution:      :      1.0000
Sample Amount: :      1.00000 [ng/ul] (not used in calc.)
Do not use Multiplier & Dilution Factor with ISTDs

Signal 1: MWD1 B, Sig=254,16 Ref=360,100

Peak RetTime Type Width Area Height Area
# [min] [min] [mAU*s] [mAU] %
-----|-----|-----|-----|-----|-----
1 8.428 MM 0.1526 303.17361 33.10900 11.6574
2 8.951 MM 0.1738 2297.53027 220.30220 88.3426

Totals :                2600.70389 253.41120
    
```

Figure s28. HPLC spectrum of chiral adduct 4 in Table 3 Entry 10.

Table 3 Entry 11

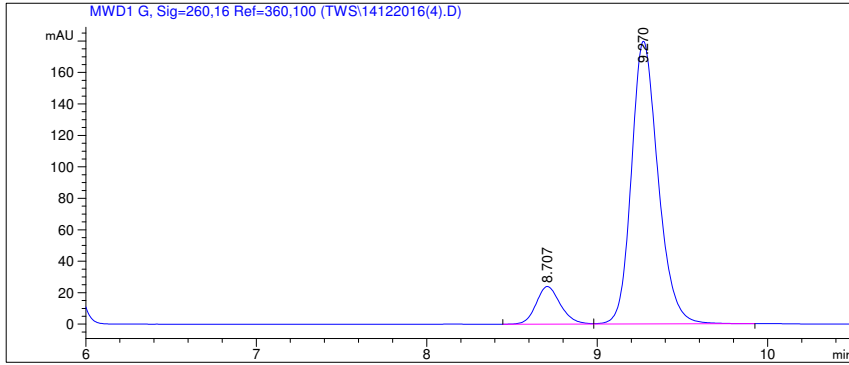

```

=====
                          Area Percent Report
=====

Sorted By      :      Signal
Multiplier:    :      1.0000
Dilution:      :      1.0000
Sample Amount: :      1.00000 [ng/ul] (not used in calc.)
Do not use Multiplier & Dilution Factor with ISTDs

Signal 1: MWD1 G, Sig=260,16 Ref=360,100

Peak RetTime Type Width Area Height Area
# [min] [min] [mAU*s] [mAU] %
-----|-----|-----|-----|-----|-----
1 8.707 BV 0.1517 237.57396 23.95535 10.8312
2 9.270 VB 0.1669 1955.83997 179.82191 89.1688

Totals :                2193.41393 203.77727
    
```

Figure s29. HPLC spectrum of chiral adduct 4 in Table 3 Entry 11.

### **Investigation of possible interactions between complex 5c and reagent(s)**

We wish to examine whether complex **5c** interacts with (1) both nitrostyrene **3** and diphenylarsine or only (2) either one of the reagents. This was done by a combination of  $^1\text{H}$  and  $^{31}\text{P}\{^1\text{H}\}$  NMR spectroscopy. To ensure that any transient interaction(s) between complex **5c** and reagent(s) were detected, a series of variable temperature (VT) NMR experiments (-60°C to 25°C) were conducted.

**Control A:** Nitrostyrene **3** (5.00 mg, 33.50  $\mu\text{mol}$ ) was stirred in MeOD (0.5 mL) for 10 mins at RT.

**Control B:** Complex **5c** (8.80 mg, 10.70  $\mu\text{mol}$ ) was stirred in MeOD (0.5 mL) for 10 mins at RT.

**Sample C:** Nitrostyrene **3** (2.00 mg, 13.40  $\mu\text{mol}$ , 1.0 equiv.) and complex **5c** (1.10 mg, 1.34  $\mu\text{mol}$ , 0.1 equiv.) were stirred in MeOD (0.5 mL) for 10 mins at RT.

**Sample D:** Diphenylarsine (5.20 mg, 22.60  $\mu\text{mol}$ , 1.0 equiv.) and complex **5c** (1.88 mg, 2.25  $\mu\text{mol}$ , 0.1 equiv.) were stirred in MeOD (0.5 mL) for 10 mins at RT.

### Control A ( $^1\text{H}$ NMR spectra of nitrostyrene 3)

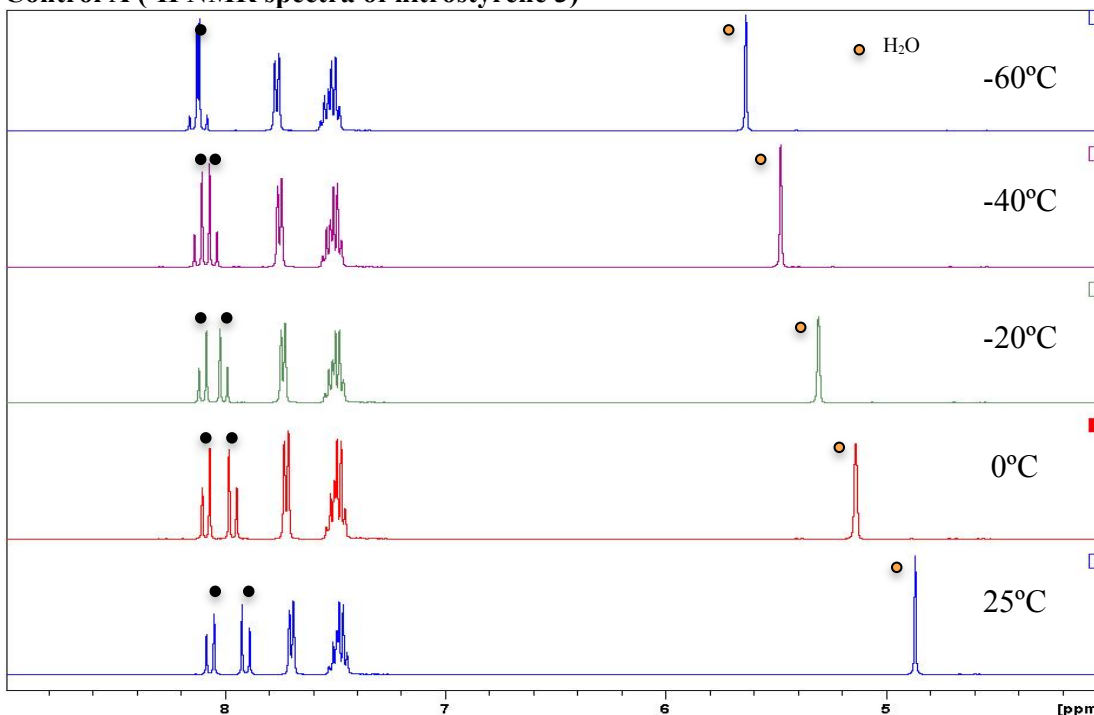

Figure s30. VT  $^1\text{H}$  NMR spectra of control A (nitrostyrene 3). Signals corresponding to vinylic protons of nitrostyrene 3 labeled with a black dot.

The vinylic proton signals of nitrostyrene 3 (labeled with a black dot) were observed to symmetrically converge towards 8.15 ppm as the temperature was lowered (Figure s30).

### Control B ( $^{31}\text{P}\{^1\text{H}\}$ NMR spectra of complex 5c)

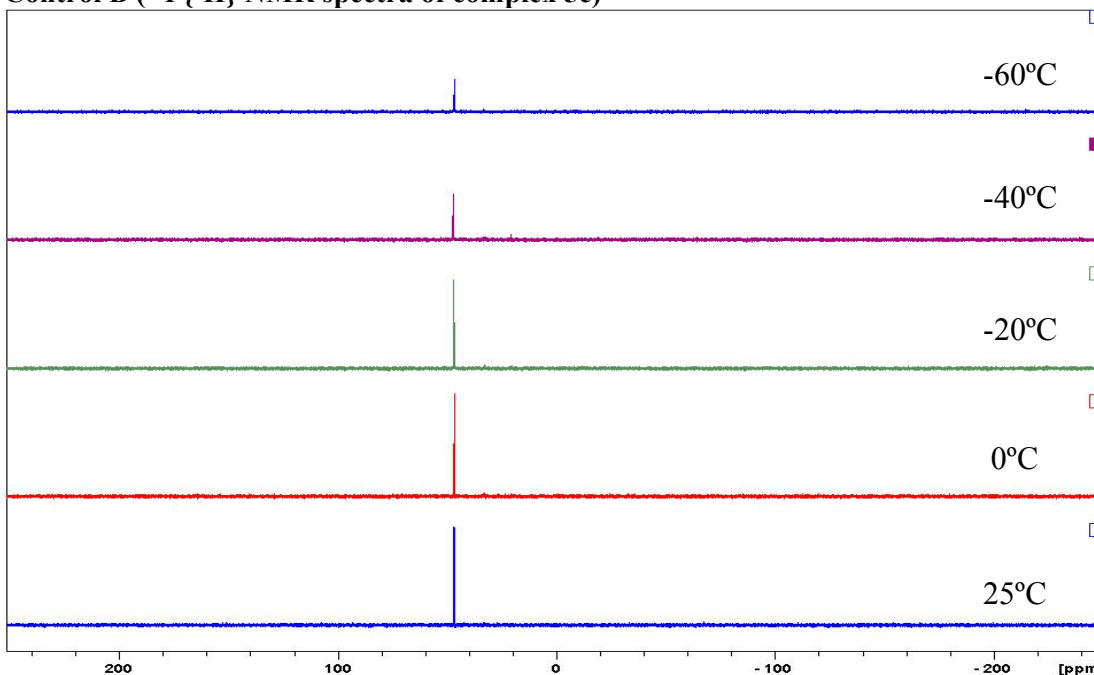

Figure s31. VT  $^{31}\text{P}\{^1\text{H}\}$  NMR spectra of control B (complex 5c).

The  $^{31}\text{P}\{^1\text{H}\}$  of complex 5c remained unchanged as temperature was lowered (Figure s31).

Sample C ( $^1\text{H}$  NMR spectra of nitrostyrene 3 with complex 5c)

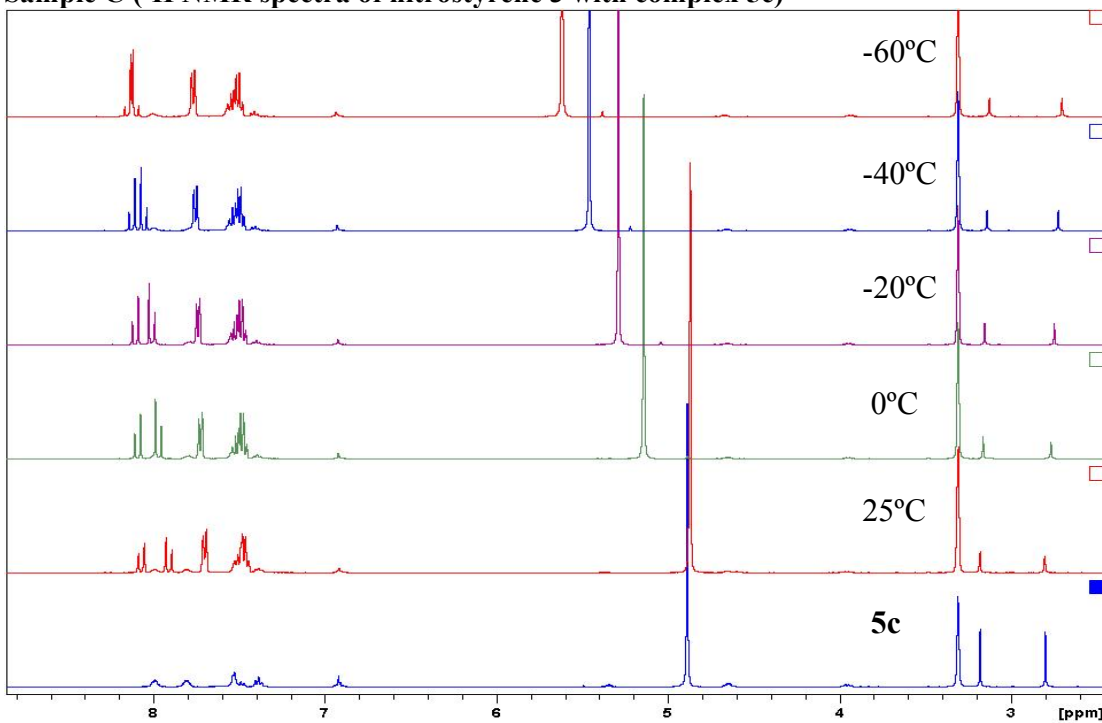

Figure s32. VT  $^1\text{H}$  NMR spectra of sample C (nitrostyrene 3 with complex 5c).

Sample C ( $^{31}\text{P}\{^1\text{H}\}$  NMR spectra of nitrostyrene 3 with complex 5c)

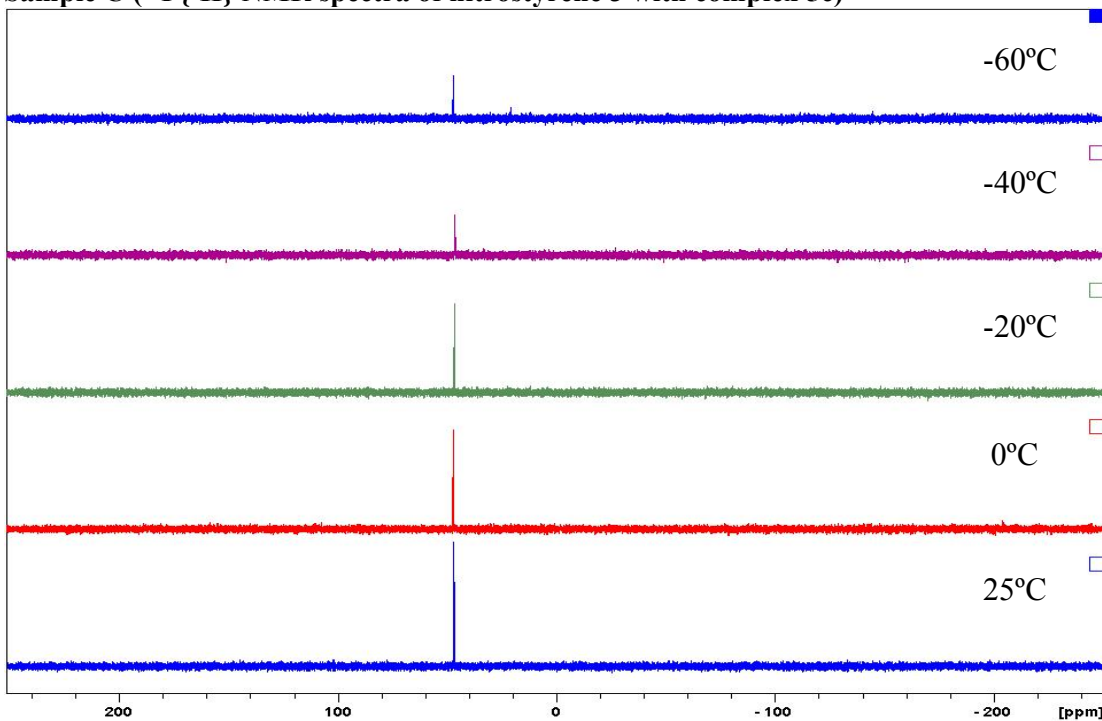

Figure s33. VT  $^{31}\text{P}\{^1\text{H}\}$  NMR spectra of sample C (nitrostyrene 3 with complex 5c).

By comparing the NMR spectra of sample C (Figures s32 and s33) to controls A and B (Figures s30 and s31), it is clear that there were no interactions between nitrostyrene 3 and complex 5c.

Sample D ( $^{31}\text{P}\{^1\text{H}\}$  NMR spectra of diphenylarsine with complex 5c)

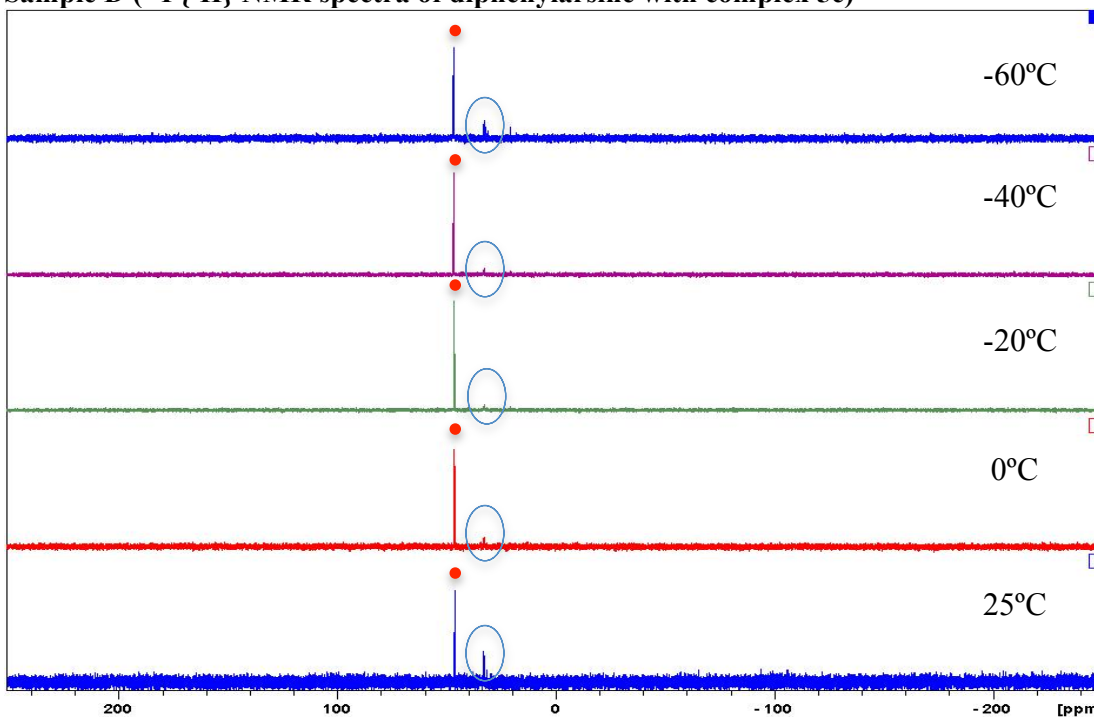

Figure s34. VT  $^{31}\text{P}\{^1\text{H}\}$  NMR spectra of sample D (diphenylarsine with complex 5c). Signals corresponding to ester functionalities of catalyst 5c labeled with a red dot.

By comparison of the  $^{31}\text{P}\{^1\text{H}\}$  NMR spectra of sample **D** (Figure s34) with control **B** (Figure s31), we observed the appearance of a new signal at 33.1 ppm (see circles on Figure s34). While we are unable to identify the species corresponding to the minor signal at 33.1 ppm, it may be concluded that the appearance of this signal is attributed to some interaction of complex **5c** with diphenylarsine.



### Conducting of catalysis in MeOD

Sample **E**: Nitrostyrene **3** (5.60 mg, 36.55  $\mu\text{mol}$ , 1.0 equiv.), diphenylarsine (10.30 mg, 44.76  $\mu\text{mol}$ , 1.2 equiv.) and complex **5c** (2.50 mg, 3.02  $\mu\text{mol}$ , 0.08 equiv.) were stirred in  $\text{CD}_3\text{OD}$  (1 mL) for 5.5 h at RT.

Sample **F**: Nitrostyrene **3** (5.60 mg, 36.55  $\mu\text{mol}$ , 1.0 equiv.), diphenylarsine (10.30 mg, 44.76  $\mu\text{mol}$ , 1.2 equiv.) and complex **5c** (2.50 mg, 3.02  $\mu\text{mol}$ , 0.08 equiv.) were stirred in  $\text{CD}_3\text{OD}$  (1 mL) for 0.5 h at RT.

Sample **G**: Nitrostyrene **3** (5.60 mg, 36.55  $\mu\text{mol}$ , 1.0 equiv.), diphenylarsine (10.30 mg, 44.76  $\mu\text{mol}$ , 1.2 equiv.) and complex **5c** (2.50 mg, 3.02  $\mu\text{mol}$ , 0.08 equiv.) were stirred in  $\text{CH}_3\text{OH}$  (1 mL) for 0.5 h at RT.

### Samples E, F, G ( $^1\text{H}$ NMR spectra of nitrostyrene **3**, diphenylarsine and complex **5c**)

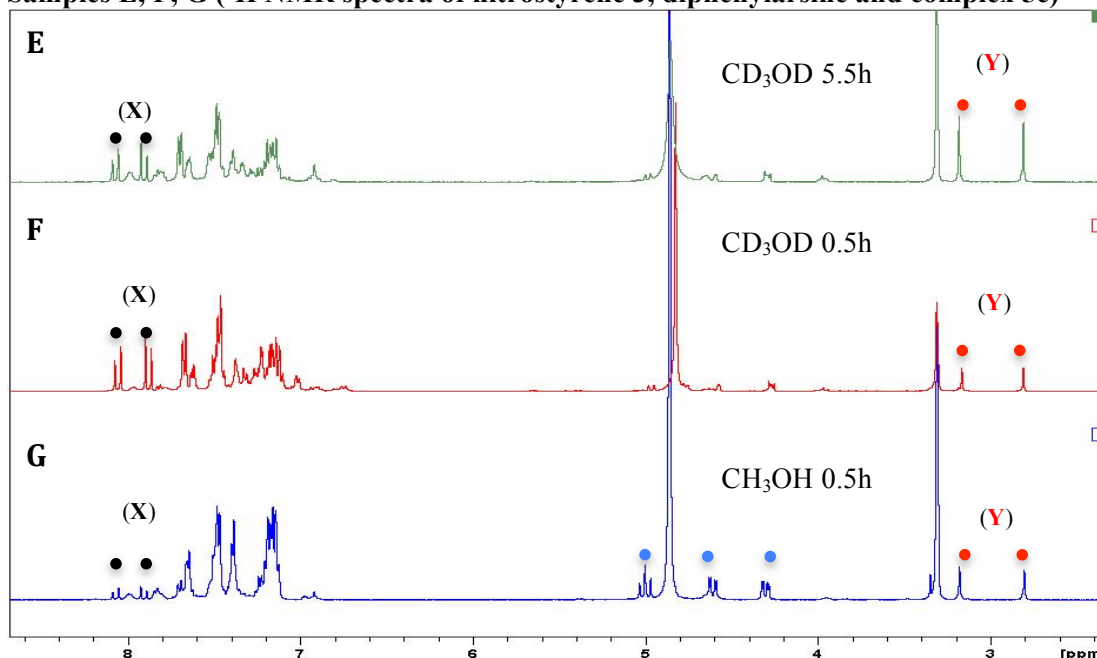

Figure s35.  $^1\text{H}$  NMR spectra of AHAs reaction in  $\text{CH}_3\text{OH}$  and  $\text{CD}_3\text{OD}$ . Signals corresponding to vinylic protons of nitrostyrene **3** labelled with a black dot, aliphatic protons of adduct **4** with a blue dot and ester functionalities of catalyst **5c** with a red dot.

Table s1. Ratios of signals X:Y.

| Sample   | Ratio of X:Y <sup>a</sup> |
|----------|---------------------------|
| <b>E</b> | 0.7966 : 1                |
| <b>F</b> | 0.8347 : 1                |
| <b>G</b> | 0.5695 : 1                |

<sup>a</sup> Ratio of X:Y was determined by integration of the respective signals. Cat. **5c** signals indicated by red dots were taken as internal standard.

The integrals of vinylic protons on nitrostyrene **3** (black dots on Figure s35) were taken with respect to catalyst  $-\text{CO}_2\text{Me}$  signals (red dots on Figure s35, taken as internal standard) in the ratio of X:Y (Table s1). It was observed that the X:Y ratio of Sample **E** (0.7966 : 1) was still higher than that of sample **G** (0.5695 : 1), reflecting a slower rate of consumption of nitrostyrene **3** when the reaction was conducted in  $\text{CD}_3\text{OD}$ .

## Investigation of Complex 5c

To examine the structural integrity of the tridentate PCP ligand on complex **5c**, complex **5c** (8.80 mg, 10.70  $\mu\text{mol}$ , 1.0 equiv.) in DCM (2 mL) was treated with 10 mM aqueous KCN (2.00 mL, 0.21 mmol, 20.0 equiv.) and stirred overnight (Figure s36, Spectrum I). Based on previous experience, decomplexation of the ligand from the metal should occur (Scheme s7). However, we did not observe the appearance of the free phosphine peak (Figure s36, Spectrum H) even after stirring for three days. Therefore we are convinced that the PCP ligand does not dissociate.

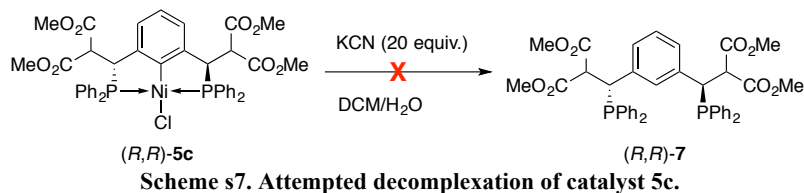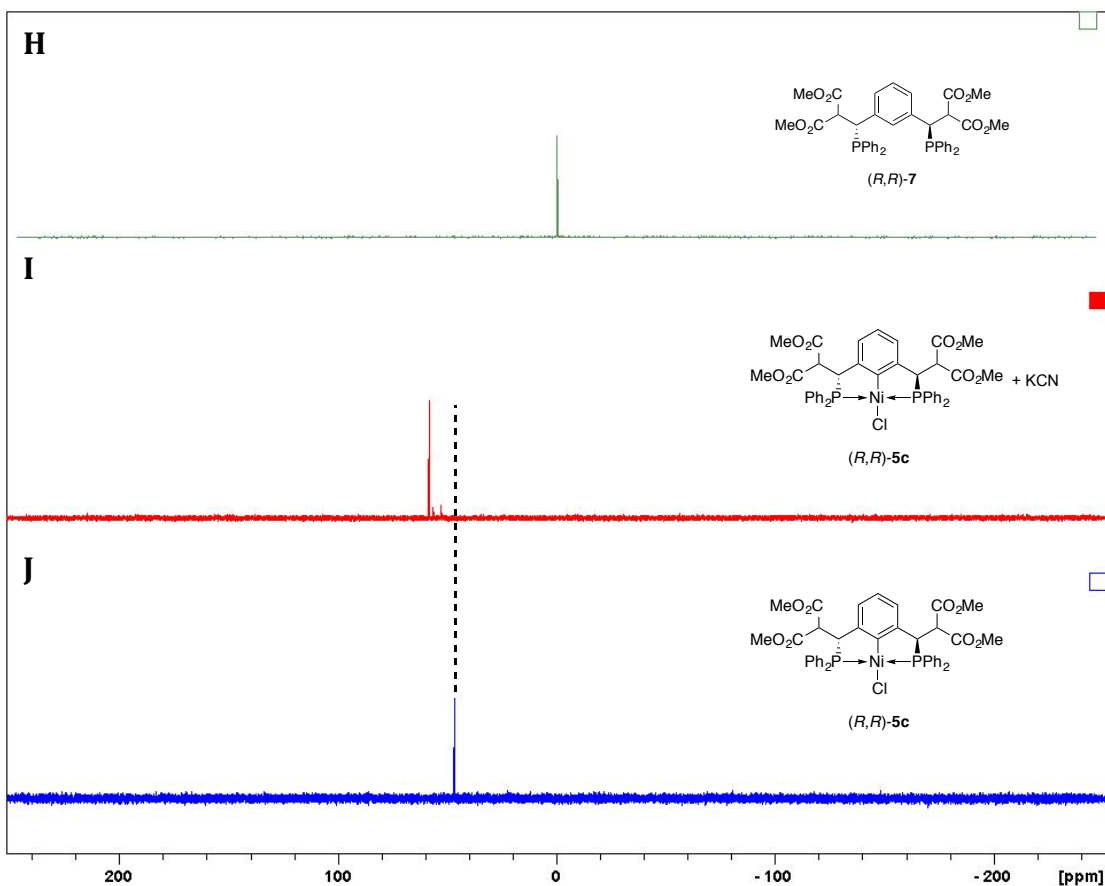

### X-Ray Structure of Complex (S)-6

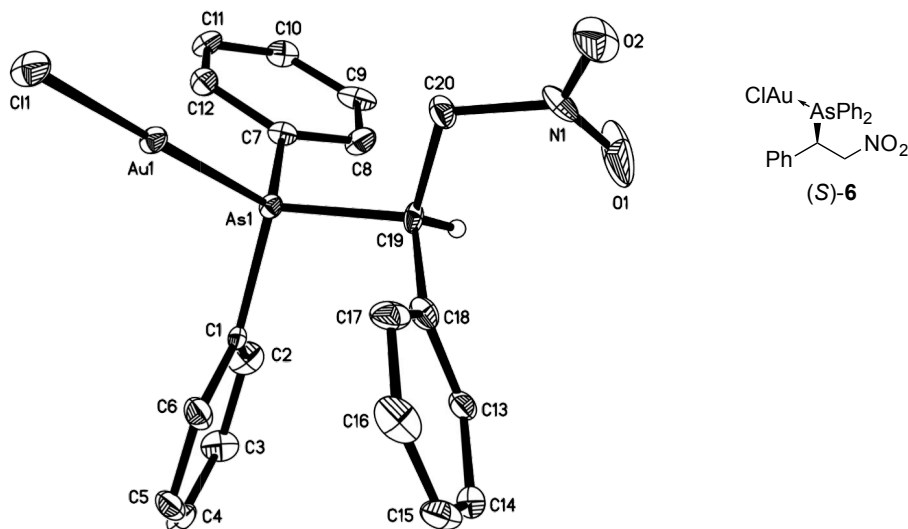

Figure s37. ORTEP of arsine-gold adduct (S)-6.

### Crystallographic Data for Complex (S)-6

|                                            |                                                             |                             |
|--------------------------------------------|-------------------------------------------------------------|-----------------------------|
| <b>Chemical formula</b>                    | $C_{20}H_{18}AsAuClNO_2$                                    |                             |
| <b>Formula weight</b>                      | 611.69 g/mol                                                |                             |
| <b>Temperature</b>                         | 103(2) K                                                    |                             |
| <b>Wavelength</b>                          | 0.71073 Å                                                   |                             |
| <b>Crystal size</b>                        | 0.100 x 0.120 x 0.360 mm                                    |                             |
| <b>Crystal habit</b>                       | colorless block                                             |                             |
| <b>Crystal system</b>                      | monoclinic                                                  |                             |
| <b>Space group</b>                         | P 1 21 1                                                    |                             |
| <b>Unit cell dimensions</b>                | $a = 9.8186(5)$ Å                                           | $\alpha = 90^\circ$         |
|                                            | $b = 9.2688(5)$ Å                                           | $\beta = 99.2433(18)^\circ$ |
|                                            | $c = 10.8223(5)$ Å                                          | $\gamma = 90^\circ$         |
| <b>Volume</b>                              | $972.11(9)$ Å <sup>3</sup>                                  |                             |
| <b>Z</b>                                   | 2                                                           |                             |
| <b>Density (calculated)</b>                | $2.090$ g/cm <sup>3</sup>                                   |                             |
| <b>Absorption coefficient</b>              | $9.407$ mm <sup>-1</sup>                                    |                             |
| <b>F(000)</b>                              | 580                                                         |                             |
| <b>Theta range for data collection</b>     | 1.91 to 27.99°                                              |                             |
| <b>Index ranges</b>                        | $-12 \leq h \leq 12, -6 \leq k \leq 12, -14 \leq l \leq 14$ |                             |
| <b>Reflections collected</b>               | 14442                                                       |                             |
| <b>Independent reflections</b>             | 3710 [R(int) = 0.0664]                                      |                             |
| <b>Coverage of independent reflections</b> | 100.0%                                                      |                             |
| <b>Absorption correction</b>               | Multi-Scan                                                  |                             |
| <b>Max. and min. transmission</b>          | 0.4530 and 0.1330                                           |                             |

|                                         |                                                                                                                                                       |
|-----------------------------------------|-------------------------------------------------------------------------------------------------------------------------------------------------------|
| <b>Structure solution technique</b>     | direct methods                                                                                                                                        |
| <b>Structure solution program</b>       | XT, VERSION 2014/5                                                                                                                                    |
| <b>Refinement method</b>                | Full-matrix least-squares on F <sup>2</sup>                                                                                                           |
| <b>Refinement program</b>               | SHELXL-2014/7 (Sheldrick, 2014)                                                                                                                       |
| <b>Function minimized</b>               | $\Sigma w(F_o^2 - F_c^2)^2$                                                                                                                           |
| <b>Data / restraints / parameters</b>   | 3710 / 1 / 235                                                                                                                                        |
| <b>Goodness-of-fit on F<sup>2</sup></b> | 1.029                                                                                                                                                 |
| <b>Final R indices</b>                  | 3401 data; I>2σ(I)      R1 = 0.0348, wR2 = 0.0675<br>all data      R1 = 0.0421, wR2 = 0.0706                                                          |
| <b>Weighting scheme</b>                 | w=1/[σ <sup>2</sup> (F <sub>o</sub> <sup>2</sup> )+(0.0198P) <sup>2</sup> ]<br>where P=(F <sub>o</sub> <sup>2</sup> +2F <sub>c</sub> <sup>2</sup> )/3 |
| <b>Absolute structure parameter</b>     | -0.005(13)                                                                                                                                            |
| <b>Largest diff. peak and hole</b>      | 2.361 and -2.019 eÅ <sup>-3</sup>                                                                                                                     |
| <b>R.M.S. deviation from mean</b>       | 0.181 eÅ <sup>-3</sup>                                                                                                                                |

**Table s2. Bond lengths (Å) of complex (S)-6.**

|          |           |          |            |
|----------|-----------|----------|------------|
| As1-C7   | 1.913(9)  | As1-C1   | 1.923(9)   |
| As1-C19  | 1.979(9)  | As1-Au1  | 2.3309(11) |
| Au1-C11  | 2.279(3)  | C1-C2    | 1.379(14)  |
| C1-C6    | 1.410(12) | C2-C3    | 1.400(14)  |
| C2-H2    | 0.95      | C3-C4    | 1.392(14)  |
| C3-H3    | 0.95      | C4-C5    | 1.377(16)  |
| C4-H4    | 0.95      | C5-C6    | 1.377(13)  |
| C5-H5    | 0.95      | C6-H6    | 0.95       |
| C7-C12   | 1.395(13) | C7-C8    | 1.398(14)  |
| C8-C9    | 1.397(12) | C8-H8    | 0.95       |
| C9-C10   | 1.372(16) | C9-H9    | 0.95       |
| C10-C11  | 1.376(14) | C10-H10  | 0.95       |
| C11-C12  | 1.388(12) | C11-H11  | 0.95       |
| C12-H12  | 0.95      | C13-C14  | 1.375(12)  |
| C13-C18  | 1.394(13) | C13-H13  | 0.95       |
| C14-C15  | 1.387(15) | C14-H14  | 0.95       |
| C15-C16  | 1.391(15) | C15-H15  | 0.95       |
| C16-C17  | 1.416(13) | C16-H16  | 0.95       |
| C17-C18  | 1.402(14) | C17-H17  | 0.95       |
| C18-C19  | 1.504(12) | C19-C20  | 1.508(13)  |
| C19-H19  | 1.0       | C20-N1   | 1.495(13)  |
| C20-H20A | 0.99      | C20-H20B | 0.99       |
| N1-O1    | 1.205(14) | N1-O2    | 1.218(12)  |

**Table s3. Bond angles (°) of complex (S)-6.**

|               |           |              |           |
|---------------|-----------|--------------|-----------|
| C7-As1-C1     | 104.9(4)  | C7-As1-C19   | 105.3(4)  |
| C1-As1-C19    | 105.2(4)  | C7-As1-Au1   | 117.1(3)  |
| C1-As1-Au1    | 112.8(3)  | C19-As1-Au1  | 110.7(3)  |
| C11-Au1-As1   | 176.63(7) | C2-C1-C6     | 119.6(9)  |
| C2-C1-As1     | 121.1(7)  | C6-C1-As1    | 119.3(7)  |
| C1-C2-C3      | 119.9(9)  | C1-C2-H2     | 120.0     |
| C3-C2-H2      | 120.0     | C4-C3-C2     | 119.5(10) |
| C4-C3-H3      | 120.3     | C2-C3-H3     | 120.3     |
| C5-C4-C3      | 120.8(10) | C5-C4-H4     | 119.6     |
| C3-C4-H4      | 119.6     | C4-C5-C6     | 119.8(10) |
| C4-C5-H5      | 120.1     | C6-C5-H5     | 120.1     |
| C5-C6-C1      | 120.3(10) | C5-C6-H6     | 119.8     |
| C1-C6-H6      | 119.8     | C12-C7-C8    | 119.5(8)  |
| C12-C7-As1    | 117.7(7)  | C8-C7-As1    | 122.5(7)  |
| C9-C8-C7      | 119.2(10) | C9-C8-H8     | 120.4     |
| C7-C8-H8      | 120.4     | C10-C9-C8    | 120.5(12) |
| C10-C9-H9     | 119.8     | C8-C9-H9     | 119.8     |
| C9-C10-C11    | 120.5(10) | C9-C10-H10   | 119.7     |
| C11-C10-H10   | 119.7     | C10-C11-C12  | 120.0(9)  |
| C10-C11-H11   | 120.0     | C12-C11-H11  | 120.0     |
| C11-C12-C7    | 120.2(9)  | C11-C12-H12  | 119.9     |
| C7-C12-H12    | 119.9     | C14-C13-C18  | 121.5(9)  |
| C14-C13-H13   | 119.2     | C18-C13-H13  | 119.2     |
| C13-C14-C15   | 120.4(9)  | C13-C14-H14  | 119.8     |
| C15-C14-H14   | 119.8     | C14-C15-C16  | 119.9(9)  |
| C14-C15-H15   | 120.0     | C16-C15-H15  | 120.0     |
| C15-C16-C17   | 119.5(10) | C15-C16-H16  | 120.3     |
| C17-C16-H16   | 120.3     | C18-C17-C16  | 120.3(10) |
| C18-C17-H17   | 119.9     | C16-C17-H17  | 119.9     |
| C13-C18-C17   | 118.3(9)  | C13-C18-C19  | 119.5(9)  |
| C17-C18-C19   | 122.1(9)  | C18-C19-C20  | 115.8(8)  |
| C18-C19-As1   | 108.9(6)  | C20-C19-As1  | 106.7(6)  |
| C18-C19-H19   | 108.4     | C20-C19-H19  | 108.4     |
| As1-C19-H19   | 108.4     | N1-C20-C19   | 111.5(8)  |
| N1-C20-H20A   | 109.3     | C19-C20-H20A | 109.3     |
| N1-C20-H20B   | 109.3     | C19-C20-H20B | 109.3     |
| H20A-C20-H20B | 108.0     | O1-N1-O2     | 122.6(11) |
| O1-N1-C20     | 119.3(10) | O2-N1-C20    | 118.1(10) |
